# Supplementary material
Source: Springer Nature journal article supplement (https://www.springermedizin.de/resource/supplementary/12943_2004_80_MOESM3_ESM.pdf/9553390)

**2A** PC23-PSA

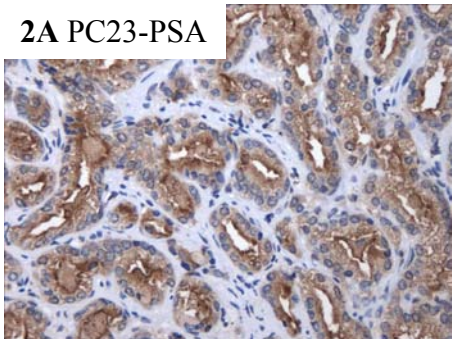

**2B** PC23-PTCH1

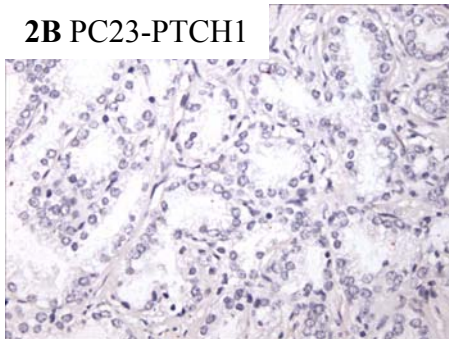

**2C** PC23-Shh

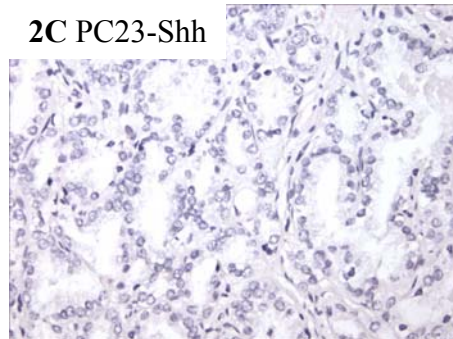

**2D** PC38-PSA

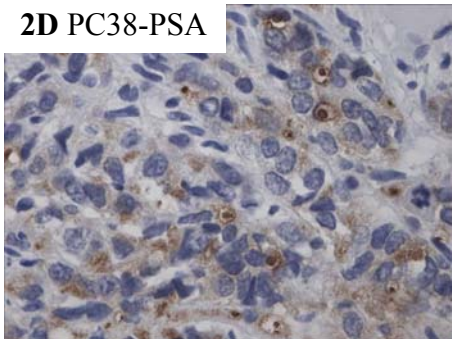

**2E** PC38-PTCH1

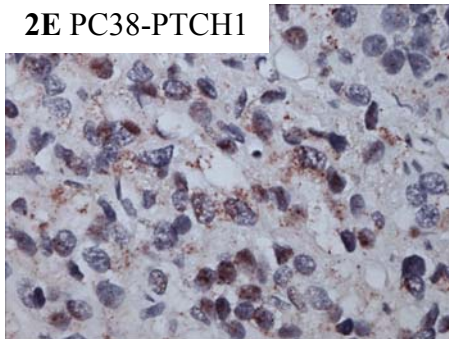

**2F** PC38-Shh

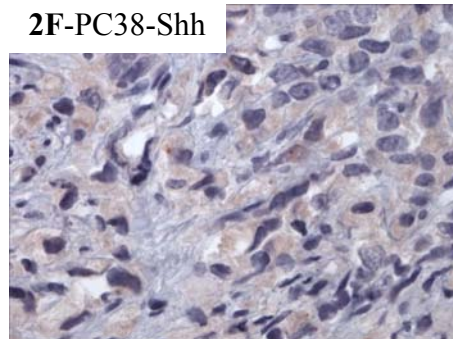

Supplement: MOESM3 [file 9553390]
